# Supplementary material for: Incident Cervical HPV Infections in Young Women: Transition Probabilities for CIN and Infection Clearance
Source: Oxford University Press journal article supplement (doi:10.1158/1055-9965.epi-10-0791), 2011-02-01
Supplement: 10559965epi100791-sup-61217_1_supp_0_lbkxv6.docx [file 10559965epi100791-sup-61217_1_supp_0_lbkxv6.docx]

**Appendix**

**Table 1A. 12, 24 and 36 month** transition probabilities for incident HPV 16, 18, 31, 33, 35, 45, 52, 58 and 59 infections without adjudication of CIN lesions positive for multiple HPV types.

|  | **Persisting**  **% (95% CI)** | **Clearing**  **% (95% CI)** | **CIN 1**  **% (95% CI)** | **CIN 2**  **% (95% CI)** | **CIN 3**  **% (95% CI)** |
| --- | --- | --- | --- | --- | --- |
| **HPV 16**  (n = 273) |  |  |  |  |  |
| 12 Months | 55.5 (49.4-61.8) | 27.1 (21.5-32.5) | 9.5 (6.0-13.7) | 5.7 (3.1-8.9) | 2.1 (0.4-4.2) |
| 24 Months | 20.3 (14.6-26.4) | 54.6 (47.3-61.3) | 16.0 (11.2-21.2) | 6.9 (3.8-10.5) | 2.1 (0.4-4.2) |
| 36 Months | 4.9 (0.0-10.2) | 63.5 (55.8-71.2) | 20.6 (14.5-27.2) | 8.9 (4.9-13.7) | 2.1 (0.4-4.2) |
|  |  |  |  |  |  |
| **HPV 18** (n = 113) |  |  |  |  |  |
| 12 Months | 41.3 (31.4-51.9) | 39.9 (29.6-50.1) | 15.0 (8.7-22.7) | 2.8 (0.0-6.7) | 0.9 (0.0-2.9) |
| 24 Months | 11.6 (4.1-20.1) | 65.2 (55.1-75.9) | 17.7 (10.1-26.1) | 4.6 (0.9-9.9) | 0.9 (0.0-2.9) |
| 36 Months | 1.9 (0.0-6.7) | 71.0 (61.2-81.3) | 19.5 (11.4-28.9) | 6.6 (1.5-13.9) | 0.9 (0.0-2.9) |
|  |  |  |  |  |  |
| **HPV 31*** (n = 157) |  |  |  |  |  |
| 12 Months | 47.9 (39.6-56.4) | 30.5 (23.0-38.4) | 13.7 (8.4-20.1) | 5.0 (1.5-8.8) | 2.9 (0.7-6.2) |
| 24 Months | 21.7 (14.5-29.6) | 50.0 (41.3-59.4) | 19.5 (13.4-26.4) | 5.8 (2.2-10.2) | 2.9 (0.7-6.2) |
| 36 Months | 5.1 (0.0-11.7) | 60.7 (51.2-70.0) | 23.5 (15.6-32.7) | 5.8 (2.2-10.2) | 4.9 (0.7-10.5) |
|  |  |  |  |  |  |
| **HPV 33** (n = 57) |  |  |  |  |  |
| 12 Months | 53.7 (39.8-67.8) | 38.5 (24.8-51.9) | 2.1 (0.0-6.7) | 5.6 (0.0-13.0) | 0.0 (-) |
| 24 Months | 18.0 (7.5-30.4) | 65.5 (49.5-79.0) | 4.2 (0.0-10.3) | 7.7 (1.8-15.8) | 4.5 (0.0-11.4) |
| 36 Months | 1.7 (0.0-11.9) | 74.7 (58.4-89.2) | 7.3 (0.0-16.5) | 11.7 (2.2-23.4) | 4.5 (0.0-11.4) |
|  |  |  |  |  |  |
| **HPV 35** (n = 52) |  |  |  |  |  |
| 12 Months | 45.2 (28.9-59.9) | 43.4 (28.7-57.6) | 9.1 (2.0-17.9) | 2.3 (0.0-7.7) | 0.0 (-) |
| 24 Months | 7.4 (0.0-17.6) | 71.4 (56.4-84.3) | 9.1 (2.0-17.9) | 8.6 (0.0-19.1) | 3.6 (0.0-11.1) |
| 36 Months | 3.7 (0.0-12.2) | 71.4 (56.4-84.3) | 12.8 (2.3-23.5) | 8.6 (0.0-19.1) | 3.6 (0.0-11.1) |
|  |  |  |  |  |  |
| **HPV 45** (n = 77) |  |  |  |  |  |
| 12 Months | 43.4 (30.5-56.7) | 40.1 (27.9-52.5) | 13.1 (5.6-21.0) | 3.3 (0.0-8.3) | 0.0 (-) |
| 24 Months | 15.3 (5.7-26.1) | 68.2 (56.0-80.0) | 13.1 (5.6-21.0) | 3.3 (0.0-8.3) | 0.0 (-) |
| 36 Months | 3.2 (0.0-16.6) | 80.3 (65.1-91.2) | 13.1 (5.6-21.0) | 3.3 (0.0-8.3) | 0.0 (-) |
|  |  |  |  |  |  |
| **HPV 52** (n = 173) |  |  |  |  |  |
| 12 Months | 54.2 (45.8-62.6) | 32.8 (25.2-40.6) | 7.7 (3.6-12.6) | 3.9 (1.3-7.3) | 1.4 (0.0-3.6) |
| 24 Months | 21.4 (13.5-29.5) | 57.1 (47.5-66.6) | 16.3 (9.6-23.5) | 3.9 (1.3-7.3) | 1.4 (0.0-3.6) |
| 36 Months | 11.1 (3.4-19.2) | 63.7 (53.9-73.4) | 19.9 (12.1-28.9) | 3.9 (1.3-7.3) | 1.4 (0.0-3.6) |
|  |  |  |  |  |  |
| **HPV 58** (n = 109) |  |  |  |  |  |
| 12 Months | 53.7 (43.3-64.6) | 28.7 (19.4-38.6) | 14.5 (8.0-21.2) | 2.2 (0.0-5.7) | 0.9 (0.0-2.8) |
| 24 Months | 22.0 (11.1-33.4) | 53.1 (41.0-64.8) | 17.8 (10.4-25.9) | 6.2 (0.9-13.4) | 0.9 (0.0-2.8) |
| 36 Months | 12.2 (0.0-28.4) | 62.8 (45.7-81.3) | 17.8 (10.4-25.9) | 6.2 (0.9-13.4) | 0.9 (0.0-2.8) |
|  |  |  |  |  |  |
| **HPV 59** (n = 172) |  |  |  |  |  |
| 12 Months | 38.9 (30.3-47.5) | 53.7 (44.5-62.2) | 6.8 (2.8-10.8) | 0.6 (0.0-1.8) | 0.0 (-) |
| 24 Months | 6.5 (2.1-11.4) | 83.3 (76.3-89.6) | 9.6 (5.3-14.9) | 0.6 (0.0-1.8) | 0.0 (-) |
| 36 Months | 0.1 (0.0-1.7) | 88.8 (81.2-93.2) | 9.6 (5.3-14.9) | 2.2 (0.0-6.3) | 0.0 (-) |

* Persistent infection with longest follow-up time was censored prior to 36 months (at month 34).

CI = Confidence Interval; NA = Not Applicable

**Table 1B.** 12 and 24 month transition probabilities for incident HPV 16, 18, 31, 45, 52 and 58 infected CIN 1 lesions without

adjudication of CIN lesions positive for multiple HPV types.

|  | **Persisting With CIN 1/HPV**  **% (95% CI)** | **Clearing HPV**  **% (95% CI)** | **CIN 2**  **% (95% CI)** | **CIN 3**  **% (95% CI)** |
| --- | --- | --- | --- | --- |
| **HPV 16** (n = 37) |  |  |  |  |
| 12 Months | 35.7 (14.6-58.1) | 41.4 (20.1-61.8) | 13.5 (0.0-30.3) | 9.3 (0.0-23.9) |
| 24 Months | 5.6 (0.0-29.6) | 48.5 (24.9-73.9) | 29.4 (4.3-57.8) | 16.4 (0.0-37.6) |
| **HPV 18** (n = 18) |  |  |  |  |
| 12 Months | 52.1 (24.3-80.2) | 39.2 (14.3-66.7) | 8.7 (0.0-30.0) | 0.0 (-) |
| 24 Months | NA* | NA* | NA* | NA* |
| **HPV 31** (n = 28) |  |  |  |  |
| 12 Months | 12.5 (0.0-38.5) | 74.8 (46.0-100.0) | 12.6 (0.0-39.5) | 0.0 (-) |
| 24 Months | 0.6 (0.0-7.7) | 86.8 (59.6-100.0) | 12.6 (0.0-39.5) | 0.0 (-) |
| **HPV 45** (n = 9) |  |  |  |  |
| 12 Months | 26.6 (0.0-57.1) | 73.4 (41.7-100.0) | 0.0 (-) | 0.0 (-) |
| 24 Months | NA* | NA* | NA* | NA* |
| **HPV 52**  (n = 22) |  |  |  |  |
| 12 Months | 14.2 (0.0-38.9) | 66.1 (38.4-91.5) | 12.2 (0.0-38.9) | 7.4 (0.0-21.9) |
| 24 Months | 1.5 (0.0-18.3) | 78.8 (50.7-100.0) | 12.2 (0.0-38.9) | 7.4 (0.0-21.9) |
| **HPV 58** (n = 16) |  |  |  |  |
| 12 Months | 31.8 (7.5-57.8) | 61.2 (33.3-87.9) | 7.0 (0.0-21.4) | 0.0 (-) |
| 24 Months | NA* | NA* | NA* | NA* |
| **HPV 59** (n = 13) |  |  |  |  |
| 12 Months† | 16.5 (0.0-50.0) | 74.4 (40.0-100.0) | 0.0 (-) | 8.9 (0.0-30.0) |
| 24 Months | NA* | NA* | NA* | NA* |

* Individual(s) with longest follow-up time(s) were censored prior to 24 months post-incident CIN 1.

† The longest available follow-up time for HPV 59-positive CIN 1 lesions was 11 months.

CI = Confidence Interval; NA = Not Applicable

**Table 2A.**  Prevalence of HPV 6, 11, 16, 18, 31, 33, 35, 39, 45, 51, 52, 56, 58 and 59 infections in

CIN 1, CIN 2 and CIN 3 lesions (data derived from placebo arms of all Phase III trials)

| **Diagnosis/HPV Type(s)** | **n (%)** |
| --- | --- |
| **CIN 1** |  |
| Exactly one type detected |  |
| HPV 6 | 31 (1.9) |
| HPV 11 | 10 (0.6) |
| HPV 16 | 84 (5.3) |
| HPV 18 | 35 (2.2) |
| HPV 31 | 51 (3.2) |
| HPV 33 | 20 (1.3) |
| HPV 35 | 11 (0.7) |
| HPV 39 | 62 (3.9) |
| HPV 45 | 19 (1.2) |
| HPV 51 | 77 (4.8) |
| HPV 52 | 59 (3.7) |
| HPV 56 | 70 (4.4) |
| HPV 58 | 43 (2.7) |
| HPV 59 | 20 (1.3) |
| Exactly two types detected |  |
| HPV 6 and 11 | 1 (0.1) |
| HPV 6 and 16 | 1 (0.1) |
| HPV 6 and 18 | 2 (0.1) |
| HPV 6 and 31 | 3 (0.2) |
| HPV 6 and 39 | 1 (0.1) |
| HPV 6 and 51 | 1 (0.1) |
| HPV 6 and 51 | 5 (0.3) |
| HPV 6 and 52 | 1 (0.1) |
| HPV 6 and 56 | 2 (0.1) |
| HPV 6 and 58 | 1 (0.1) |
| HPV 6 and 59 | 2 (0.1) |
| HPV 11 and 16 | 5 (0.3) |
| HPV 11 and 39 | 1 (0.1) |
| HPV 11 and 51 | 1 (0.1) |
| HPV 16 and 18 | 4 (0.3) |
| HPV 16 and 31 | 5 (0.3) |
| HPV 16 and 33 | 2 (0.1) |
| HPV 16 and 35 | 2 (0.1) |
| HPV 16 and 39 | 4 (0.3) |
| HPV 16 and 45 | 1 (0.1) |
| HPV 16 and 51 | 6 (0.4) |
| HPV 16 and 52 | 4 (0.3) |
| HPV 16 and 56 | 5 (0.3) |
| HPV 16 and 58 | 2 (0.1) |
| HPV 16 and 59 | 1 (0.1) |
| HPV 18 and 31 | 3 (0.2) |
| HPV 18 and 33 | 2 (0.1) |
| HPV 18 and 39 | 1 (0.1) |
| HPV 18 and 51 | 1 (0.1) |
| HPV 18 and 52 | 6 (0.4) |
| HPV 18 and 56 | 7 (0.4) |
| HPV 18 and 58 | 1 (0.1) |
| HPV 18 and 59 | 1 (0.1) |
| HPV 31 and 35 | 1 (0.1) |
| HPV 31 and 39 | 2 (0.1) |
| HPV 31 and 51 | 8 (0.5) |
| HPV 31 and 52 | 1 (0.1) |
| HPV 31 and 56 | 3 (0.2) |
| HPV 31 and 58 | 3 (0.2) |
| HPV 31 and 59 | 2 (0.1) |
| HPV 33 and 39 | 1 (0.1) |
| HPV 33 and 51 | 2 (0.1) |
| HPV 33 and 52 | 1 (0.1) |
| HPV 33 and 58 | 1 (0.1) |
| HPV 35 and 52 | 1 (0.1) |
| HPV 35 and 56 | 1 (0.1) |
| HPV 39 and 45 | 1 (0.1) |
| HPV 39 and 51 | 2 (0.1) |
| HPV 39 and 52 | 2 (0.1) |
| HPV 39 and 56 | 6 (3.8) |
| HPV 39 and 58 | 3 (0.2) |
| HPV 39 and 59 | 2 (0.1) |
| HPV 45 and 51 | 2 (0.1) |
| HPV 45 and 52 | 1 (0.1) |
| HPV 45 and 56 | 2 (0.1) |
| HPV 51 and 52 | 5 (0.3) |
| HPV 51 and 56  HPV 51 and 59 | 5 (0.3)  3 (0.2) |
| HPV 52 and 56 | 9 (0.6) |
| HPV 52 and 58 | 1 (0.1) |
| HPV 52 and 59 | 2 (0.1) |
| HPV 56 and 58 | 2 (0.1) |
| HPV 56 and 59 | 2 (0.1) |
| HPV 58 and 59 | 2 (0.1) |
| Exactly three types detected |  |
| HPV 6 and 16 and 18 | 1 (0.1) |
| HPV 6 and 16 and 31 | 2 (0.1) |
| HPV 6 and 16 and 58 | 1 (0.1) |
| HPV 6 and 31 and 52 | 1 (0.1) |
| HPV 6 and 51 and 56  HPV 11 and 16 and 52 | 1 (0.1)  1 (0.1) |
| HPV 11 and 51 and 56 | 1 (0.1) |
| HPV 16 and 18 and 31 | 1 (0.1) |
| HPV 16 and 18 and 39 | 1 (0.1) |
| HPV 16 and 18 and 56 | 1 (0.1) |
| HPV 16 and 18 and 59 | 1 (0.1) |
| HPV 16 and 31 and 52 | 1 (0.1) |
| HPV 16 and 35 and 45 | 1 (0.1) |
| HPV 16 and 39 and 58 | 2 (0.1) |
| HPV 16 and 45 and 51 | 1 (0.1) |
| HPV 16 and 52 and 58 | 1 (0.1) |
| HPV 18 and 31 and 59 | 1 (0.1) |
| HPV 18 and 35 and 52 | 1 (0.1) |
| HPV 18 and 52 and 56 | 1 (0.1) |
| HPV 31 and 33 and 52 | 1 (0.1) |
| HPV 31 and 39 and 52 | 1 (0.1) |
| HPV 31 and 51 and 52 | 1 (0.1) |
| HPV 31 and 51 and 56 | 3 (0.2) |
| HPV 31 and 51 and 59 | 1 (0.1) |
| HPV 31 and 56 and 58 | 1 (0.1) |
| HPV 33 and 39 and 56 | 1 (0.1) |
| HPV 35 and 56 and 58 | 1 (0.1) |
| HPV 39 and 51 and 52 | 1 (0.1) |
| HPV 39 and 51 and 59 | 1 (0.1) |
| HPV 39 and 52 and 59 | 1 (0.1) |
| HPV 51 and 52 and 56 | 1 (0.1) |
| HPV 51 and 52 and 58 | 1 (0.1) |
| HPV 51 and 56 and 59 | 1 (0.1) |
| HPV 52 and 56 and 59 | 1 (0.1) |
| Exactly four types detected |  |
| HPV 6 and 18 and 45 and 52 | 1 (0.1) |
| HPV 11 and 39 and 51 and 52 | 1 (0.1) |
| HPV 16 and 18 and 51 and 56 | 1 (0.1) |
| HPV 16 and 31 and 58 and 59 | 1 (0.1) |
| HPV 16 and 45 and 58 and 59 | 1 (0.1) |
| HPV 16 and 51 and 52 and 59 | 1 (0.1) |
| HPV 18 and 52 and 56 and 59 | 1 (0.1) |
| HPV 33 and 39 and 51 and 56 | 1 (0.1) |
| HPV 33 and 45 and 52 and 58 | 1 (0.1) |
| HPV 35 and 39 and 52 and 56 | 1 (0.1) |
| HPV 39 and 51 and 56 and 59 | 1 (0.1) |
| HPV 45 and 51 and 52 and 58 | 1 (0.1) |
| Exactly five types detected |  |
| HPV 6 and 45 and 51 and 52 and 58 | 1 (0.1) |
| HPV 16 and 31 and 39 and 51 and 59 | 1 (0.1) |
| HPV 16 and 39 and 52 and 56 and 59 | 1 (0.1) |
| Exactly six types detected |  |
| HPV 16 and 18 and 39 and 51 and 52 and 56 | 1 (0.1) |
| Negative for all 14 HPV types tested* | 789 (49.3) |
| Total | 1,599 (100.0) |
| **CIN 2** |  |
| Exactly one type detected |  |
| HPV 16 | 103 (24.5) |
| HPV 18 | 8 (1.9) |
| HPV 31 | 31 (7.4) |
| HPV 33 | 16 (3.8) |
| HPV 35 | 14 (3.3) |
| HPV 39 | 6 (1.4) |
| HPV 45 | 3 (0.7) |
| HPV 51 | 20 (4.8) |
| HPV 52 | 26 (6.2) |
| HPV 56 | 15 (3.6) |
| HPV 58 | 20 (4.8) |
| HPV 59 | 1 (0.2) |
| Exactly two types detected |  |
| HPV 6 and 56 | 1 (0.2) |
| HPV 11 and 16 | 1 (0.2) |
| HPV 16 and 31 | 1 (0.2) |
| HPV 16 and 31 | 4 (1.0) |
| HPV 16 and 33 | 2 (0.5) |
| HPV 16 and 39 | 2 (0.5) |
| HPV 16 and 45 | 4 (1.0) |
| HPV 16 and 51 | 2 (0.5) |
| HPV 16 and 52 | 8 (1.9) |
| HPV 16 and 56 | 1 (0.2) |
| HPV 16 and 59 | 1 (0.2) |
| HPV 18 and 31 | 1 (0.2) |
| HPV 18 and 33 | 2 (0.5) |
| HPV 31 and 35 | 2 (0.5) |
| HPV 31 and 39 | 1 (0.2) |
| HPV 31 and 51 | 4 (1.0) |
| HPV 31 and 52 | 6 (1.4) |
| HPV 31 and 56 | 2 (0.5) |
| HPV 31 and 58 | 1 (0.2) |
| HPV 31 and 59 | 1 (0.2) |
| HPV 33 and 35 | 1 (0.2) |
| HPV 33 and 39 | 1 (0.2) |
| HPV 33 and 45 | 1 (0.2) |
| HPV 33 and 52 | 1 (0.2) |
| HPV 33 and 56 | 1 (0.2) |
| HPV 33 and 58 | 1 (0.2) |
| HPV 39 and 51 | 1 (0.2) |
| HPV 39 and 52 | 4 (1.0) |
| HPV 51 and 52 | 1 (0.2) |
| HPV 51 and 56 | 3 (0.7) |
| HPV 52 and 58 | 2 (0.5) |
| HPV 56 and 58 | 3 (0.7) |
| Exactly three types detected |  |
| HPV 6 and 16 and 18 | 1 (0.2) |
| HPV 6 and 16 and 35 | 1 (0.2) |
| HPV 6 and 16 and 58 | 1 (0.2) |
| HPV 11 and 16 and 56 | 1 (0.2) |
| HPV 16 and 18 and 39 | 1 (0.2) |
| HPV 16 and 18 and 45 | 1 (0.2) |
| HPV 16 and 18 and 52 | 1 (0.2) |
| HPV 16 and 31 and 51 | 2 (0.5) |
| HPV 16 and 31 and 56 | 1 (0.2) |
| HPV 16 and 35 and 56 | 1 (0.2) |
| HPV 16 and 45 and 56 | 1 (0.2) |
| HPV 16 and 51 and 52 | 1 (0.2) |
| HPV 16 and 51 and 52 | 1 (0.2) |
| HPV 18 and 31 and 39 | 1 (0.2) |
| HPV 18 and 31 and 45 | 1 (0.2) |
| HPV 18 and 31 and 51 | 1 (0.2) |
| HPV 18 and 31 and 52 | 1 (0.2) |
| HPV 18 and 33 and 56 | 1 (0.2) |
| HPV 18 and 39 and 52 | 1 (0.2) |
| HPV 18 and 45 and 52 | 1 (0.2) |
| HPV 18 and 51 and 52 | 1 (0.2) |
| HPV 18 and 51 and 58 | 1 (0.2) |
| HPV 31 and 45 and 51 | 1 (0.2) |
| HPV 35 and 52 and 58 | 1 (0.2) |
| Exactly four types detected |  |
| HPV 6 and 18 and 33 and 51 | 1 (0.2) |
| HPV 11 and 33 and 56 and 58 | 1 (0.2) |
| HPV 16 and 56 and 58 and 59 | 1 (0.2) |
| HPV 18 and 51 and 52 and 58 | 1 (0.2) |
| HPV 33 and 39 and 45 and 52 | 2 (0.5) |
| Exactly five types detected |  |
| HPV 16 and 18 and 31 and 39 and 59 | 1 (0.2) |
| HPV 16 and 31 and 51 and 52 and 56 | 1 (0.2) |
| Negative for all 14 HPV types tested* | 50 (11.9) |
| Total | 421 (100.0) |
| **CIN 3** |  |
| Exactly one type detected |  |
| HPV 11 | 1 (1.1) |
| HPV 16 | 36 (38.7) |
| HPV 31 | 8 (8.6) |
| HPV 33 | 2 (2.2) |
| HPV 35 | 2 (2.2) |
| HPV 39 | 1 (1.1) |
| HPV 45 | 1 (1.1) |
| HPV 52 | 3 (3.2) |
| HPV 56 | 2 (2.2) |
| HPV 58 | 2 (2.2) |
| Exactly two types detected |  |
| HPV 6 and 16 | 3 (3.2) |
| HPV 6 and 31 | 1 (1.1) |
| HPV 6 and 33 | 1 (1.1) |
| HPV 16 and 33 | 3 (3.2) |
| HPV 16 and 39 | 1 (1.1) |
| HPV 16 and 45 | 2 (2.2) |
| HPV 16 and 51 | 2 (2.2) |
| HPV 16 and 52 | 2 (2.2) |
| HPV 16 and 56 | 1 (1.1) |
| HPV 16 and 58 | 1 (1.1) |
| HPV 31 and 39 | 1 (1.1) |
| HPV 33 and 45 | 1 (1.1) |
| HPV 33 and 56 | 1 (1.1) |
| Exactly three types detected |  |
| HPV 16 and 18 and 33 | 1 (1.1) |
| HPV 16 and 18 and 56 | 1 (1.1) |
| HPV 16 and 52 and 56 | 1 (1.1) |
| HPV 16 and 52 and 58 | 1 (1.1) |
| HPV 18 and 31 and 51 | 1 (1.1) |
| HPV 31 and 52 and 58 | 1 (1.1) |
| HPV 33 and 39 and 59 | 1 (1.1) |
| Exactly four types detected |  |
| HPV 16 and 31 and 39 and 51 | 1 (1.1) |
| Negative for all 14 HPV types tested* | 9 (9.7) |
| Total | 93 (100.0) |

*Negative for HPV types 6, 11, 16, 18, 31, 33, 35, 39, 45, 51, 52, 56, 58, and 59

**Table 2B.** Prevalence of HPV 6, 11, 16, 18 with and without other tested HPV types* in CIN 1, CIN 2 and CIN 3 lesions (data derived from placebo arms of all Phase III trials).

| **Diagnosis/HPV Type(s)** | **n (%)** |
| --- | --- |
|  |  |
| **CIN 1** |  |
| HPV 6 and no other tested HPV type  HPV 6 and ≥1 other tested HPV type | 31 (1.9)  28 (1.8) |
| HPV 11 and no other tested HPV type | 10 (0.6) |
| HPV 11 and ≥1 other tested HPV type | 11 (0.7) |
| HPV 16 and no other tested HPV type | 84 (5.3) |
| HPV 16 and ≥1 other tested HPV type | 64 (4.0) |
| HPV 18 and no other tested HPV type | 35 (2.2) |
| HPV 18 and ≥1 other tested HPV type | 40 (2.5) |
|  |  |
| HPV 6 or 11 and no other tested HPV type | 42 (2.6) |
| HPV 6 or 11 and ≥1 other tested HPV type | 38 (2.4) |
| Total (HPV 6 or 11) | 80 (5.0) |
|  |  |
| HPV 16 or 18 and no other tested HPV type | 123 (7.7) |
| HPV 16 or 18 and ≥1 other tested HPV type | 93 (5.8) |
| Total (HPV 16 or 18) | 216 (13.5) |
|  |  |
| HPV 6 or 11 or 16 or 18 and no other tested HPV type | 174 (10.9) |
| HPV 6 or 11 or 16 or 18 and ≥1 other tested HPV type | 113 (7.1) |
| Total (HPV 6 or 11 or 16 or 18) | 287 (17.9) |
|  |  |
| **CIN 2** |  |
| HPV 6 and no other tested HPV type  HPV 6 and ≥1 other tested HPV type | 0 (0.0)  5 (1.2) |
| HPV 11 and no other tested HPV type | 0 (0.0) |
| HPV 11 and ≥1 other tested HPV type | 3 (0.7) |
| HPV 16 and no other tested HPV type | 103 (24.5) |
| HPV 16 and ≥1 other tested HPV type | 43 (10.2) |
| HPV 18 and no other tested HPV type | 8 (1.9) |
| HPV 18 and ≥1 other tested HPV type | 19 (4.5) |
|  |  |
| HPV 6 or 11 and no other tested HPV type | 0 (0.0) |
| HPV 6 or 11 and ≥1 other tested HPV type | 8 (1.9) |
| Total (HPV 6 or 11) | 8 (1.9) |
|  |  |
| HPV 16 or 18 and no other tested HPV type | 111 (26.4) |
| HPV 16 or 18 and ≥1 other tested HPV type | 57 (13.5) |
| Total (HPV 16 or 18) | 168 (39.9) |
|  |  |
| HPV 6 or 11 or 16 or 18 and no other tested HPV type | 113 (26.8) |
| HPV 6 or 11 or 16 or 18 and ≥1 other tested HPV type | 61 (14.5) |
| Total (HPV 6 or 11 or 16 or 18) | 174 (41.3) |
|  |  |
| **CIN 3** |  |
| HPV 6 and no other tested HPV type  HPV 6 and ≥1 other tested HPV type | 0 (0.0)  5 (5.4) |
| HPV 11 and no other tested HPV type | 1 (1.1) |
| HPV 11 and ≥1 other tested HPV type | 0 (0.0) |
| HPV 16 and no other tested HPV type | 36 (38.7) |
| HPV 16 and ≥1 other tested HPV type | 20 (21.5) |
| HPV 18 and no other tested HPV type | 0 (0.0) |
| HPV 18 and ≥1 other tested HPV type | 3 (3.2) |
|  |  |
| HPV 6 or 11 and no other tested HPV type | 1 (1.1) |
| HPV 6 or 11 and ≥1 other tested HPV type | 5 (5.4) |
| Total (HPV 6 or 11) | 6 (6.5) |
|  |  |
| HPV 16 or 18 and no other tested HPV type | 36 (38.7) |
| HPV 16 or 18 and ≥1 other tested HPV type | 21 (22.6) |
| Total (HPV 16 or 18) | 57 (61.3) |
|  |  |
| HPV 6 or 11 or 16 or 18 and no other tested HPV type | 40 (43.0) |
| HPV 6 or 11 or 16 or 18 and ≥1 other tested HPV type | 20 (21.5) |
| Total (HPV 6 or 11 or 16 or 18) | 60 (64.5) |

* Tested HPV types were 6, 11, 16, 18, 31, 33, 35, 39, 45, 51, 52, 56, 58, and 59

**Table 3A.** Distribution of HPV types 6, 11, 16, 18, 31, 33, 35, 39, 45, 51, 52, 56, 58 and 59 in CIN 1, CIN 2 and CIN 3 lesions testing positive for a concordant HPV type as observed in a prior or concurrent incident HPV 16/18/31/33/35/45/52/58/59 infection.

| **Diagnosis/HPV Type(s)** | **n** |
| --- | --- |
| **CIN 1** |  |
| Exactly one type detected |  |
| HPV 16 | 21 |
| HPV 18 | 11 |
| HPV 31 | 13 |
| HPV 35 | 2 |
| HPV 45 | 5 |
| HPV 52 | 10 |
| HPV 58 | 6 |
| HPV 59 | 7 |
| Exactly two types detected |  |
| HPV 6 and 16 | 1 |
| HPV 6 and 35 | 1 |
| HPV 6 and 45 | 1 |
| HPV 6 and 58 | 1 |
| HPV 16 and 18 | 1 |
| HPV 16 and 31 | 1 |
| HPV 16 and 39 | 1 |
| HPV 16 and 51 | 4 |
| HPV 16 and 52 | 3 |
| HPV 16 and 58 | 1 |
| HPV 16 and 59 | 1 |
| HPV 18 and 31 | 1 |
| HPV 18 and 33 | 1 |
| HPV 18 and 51 | 1 |
| HPV 18 and 56 | 2 |
| HPV 31 and 39 | 2 |
| HPV 31 and 51 | 1 |
| HPV 31 and 52 | 1 |
| HPV 31 and 56 | 3 |
| HPV 31 and 58 | 1 |
| HPV 31 and 59 | 1 |
| HPV 33 and 51 | 1 |
| HPV 35 and 51 | 1 |
| HPV 39 and 52 | 2 |
| HPV 39 and 58 | 1 |
| HPV 39 and 59 | 1 |
| HPV 45 and 51 | 1 |
| HPV 45 and 58 | 2 |
| HPV 51 and 52 | 1 |
| HPV 52 and 56 | 3 |
| HPV 56 and 58 | 2 |
| HPV 56 and 59 | 2 |
| HPV 58 and 59 | 1 |
| Exactly three types detected |  |
| HPV 6 and 11 and 58 | 1 |
| HPV 6 and 16 and 31 | 1 |
| HPV 6 and 16 and 56 | 1 |
| HPV 16 and 18 and 31 | 1 |
| HPV 16 and 31 and 51 | 1 |
| HPV 16 and 33 and 51 | 1 |
| HPV 31 and 51 and 56 | 2 |
| HPV 31 and 51 and 59 | 1 |
| HPV 31 and 52 and 56 | 1 |
| HPV 35 and 56 and 58 | 1 |
| Exactly four types detected |  |
| HPV 33 and 39 and 51 and 56 | 1 |
| HPV 45 and 51 and 52 and 58 | 1 |
| **CIN 2** |  |
| Exactly one type detected |  |
| HPV 16 | 10 |
| HPV 18 | 2 |
| HPV 31 | 6 |
| HPV 33 | 2 |
| HPV 35 | 2 |
| HPV 45 | 1 |
| HPV 52 | 2 |
| HPV 58 | 3 |
| HPV 59 | 2 |
| Exactly two types detected |  |
| HPV 16 and 33 | 2 |
| HPV 16 and 35 | 1 |
| HPV 16 and 39 | 2 |
| HPV 16 and 52 | 2 |
| HPV 31 and 35 | 1 |
| HPV 31 and 52 | 1 |
| HPV 31 and 58 | 1 |
| HPV 33 and 39 | 1 |
| HPV 52 and 56 | 1 |
| Exactly three types detected |  |
| HPV 16 and 18 and 39 | 1 |
| HPV 16 and 18 and 52 | 1 |
| HPV 16 and 45 and 56 | 1 |
| HPV 16 and 51 and 52 | 1 |
| HPV 18 and 33 and 56 | 1 |
| HPV 18 and 51 and 52 | 1 |
| HPV 51 and 52 and 58 | 1 |
| **CIN 3** |  |
| Exactly one type detected |  |
| HPV 16 | 2 |
| HPV 33 | 1 |
| HPV 58 | 1 |
| Exactly two types detected |  |
| HPV 31 and 39 | 1 |
| HPV 35 and 51 | 1 |
| Exactly three types detected |  |
| HPV 16 and 31 and 52 | 1 |
| HPV 16 and 33 and 52 | 1 |
| HPV 18 and 31 and 51 | 1 |
| Exactly four types detected |  |
| HPV 16 and 31 and 39 and 51 | 1 |
| HPV 16 and 31 and 52 and 56 | 1 |

HPV = human papillomavirus, CIN = cervical intraepithelial neoplasia

**Table 3B.** Distribution of HPV types 6, 11, 16, 18, 31, 33, 35, 39, 45, 51, 52, 56, 58 and 59 in CIN 2 and CIN 3 lesions testing positive for a concordant HPV type as observed in a prior incident HPV 16/18/31/33/35/45/52/58/59 infected CIN 1 lesion.

| **Diagnosis/HPV Type(s)** | **n** |
| --- | --- |
| **CIN 2** |  |
| Exactly one type detected |  |
| HPV 16 | 2 |
| HPV 18 | 1 |
| HPV 31 | 1 |
| HPV 52 | 1 |
| Exactly two types detected |  |
| HPV 16 and 51 | 2 |
| Exactly three types detected |  |
| HPV 51 and 52 and 58 | 1 |
| **CIN 3** |  |
| Exactly one type detected |  |
| HPV 16 | 1 |
| Exactly two types detected |  |
| HPV 16 and 39 | 1 |
| HPV 16 and 59 | 1 |
| Exactly three types detected |  |
| HPV 16 and 33 and 52 | 1 |
